# Supplementary material
Source: HighWire-hosted journal article supplement (https://www.annals.org/content/suppl/2006/12/14/145.12.869)
Supplement: Newton_DB_145-12-869-DCA1-A1.pdf [file Newton_DB_145-12-869-DCA1-A1.pdf]

**Appendix Table. Consolidated Standards of Reporting Trials (CONSORT) Requirements for Controlled Trials of Herbal Interventions\***

| Criteria                                                                                                                                                                       | Black Cohosh:<br>Single Herb Product                                                 | Multibotanical Product                                                               |                                                                                         |                              |
|--------------------------------------------------------------------------------------------------------------------------------------------------------------------------------|--------------------------------------------------------------------------------------|--------------------------------------------------------------------------------------|-----------------------------------------------------------------------------------------|------------------------------|
|                                                                                                                                                                                |                                                                                      | Black Cohosh                                                                         | Alfalfa                                                                                 | Boron Citrate                |
| Latin binomial name                                                                                                                                                            | <i>Actaea racemosa</i>                                                               | <i>Actaea racemosa</i>                                                               | <i>Medicago sativa</i>                                                                  | NA                           |
| Botanical authority                                                                                                                                                            |                                                                                      |                                                                                      |                                                                                         | NA                           |
| Family name                                                                                                                                                                    | Ranunculaceae                                                                        | Ranunculaceae                                                                        | Fabaceae                                                                                | NA                           |
| Common names                                                                                                                                                                   | Black bugbane, black snakeroot, bugwort, rattleroot, rattletop, rattleweed, macrotys | Black bugbane, black snakeroot, bugwort, rattleroot, rattletop, rattleweed, macrotys | Alfalfa, lucerne, purple medik, trefoil                                                 | Boron                        |
| Proprietary product name (i.e., brand name) or extract name; manufacturer                                                                                                      | CimiPure (Naturex, Avignon, France)                                                  | †                                                                                    | †                                                                                       | †                            |
| Is product authorized (licensed, registered) in United States?                                                                                                                 | Yes, trademarked                                                                     | No trademark or registration                                                         | No trademark or registration                                                            | No trademark or registration |
| Parts of plant used to produce the product or extract                                                                                                                          | Rhizome and root                                                                     | Root                                                                                 | Leaf                                                                                    | NA                           |
| Type of product used (e.g., raw, fresh, or dry, extract), type and concentration of extraction solvent, ratio of herbal drug to extract                                        | 70% ethanol extract                                                                  | Water and alcohol 4:1 extract                                                        | No solvents 4:1 extract                                                                 | NA                           |
| Method of authentication of raw materials                                                                                                                                      |                                                                                      | GC                                                                                   | TLC                                                                                     | HPLC                         |
| Lot number of the raw material                                                                                                                                                 | M008250                                                                              | SB01-0160                                                                            | 220100-50                                                                               | 021390910                    |
| State whether a voucher specimen (i.e., retention sample) retained; if so, where it is kept or deposited, and reference number                                                 | Yes, voucher specimen 51680, deposited at the New York Botanical Garden              | No—past time of retention                                                            | No—past time of retention                                                               | No—past time of retention    |
| Product dosage per capsule                                                                                                                                                     | 80 mg                                                                                | 50 mg                                                                                | 100 mg                                                                                  | 20 mg                        |
| Content (e.g., as weight, concentration; may be given as a range where appropriate) of all quantified herbal product constituents, both native and added, per dosage unit form | Per capsule: 80 mg of black cohosh, 510 mg of rice flour                             |                                                                                      |                                                                                         |                              |
| Added materials (binders, fillers, and other excipients)                                                                                                                       | Rice flour                                                                           | None                                                                                 | None                                                                                    | None                         |
| Standardization                                                                                                                                                                | Triterpene glycosides                                                                | None                                                                                 | None                                                                                    | Boron                        |
| Product's chemical fingerprint and methods used                                                                                                                                | HPLC, CE                                                                             | HPLC, CE                                                                             | HP-TLC                                                                                  | HPLC, CE                     |
| For standardized products, quantity of active/marker constituents per dosage unit form                                                                                         | 2.5%                                                                                 | NA                                                                                   | NA                                                                                      | NA                           |
| Amount detected                                                                                                                                                                | Triterpene glycosides, 3.125%                                                        | Triterpene glycosides, 4.4%                                                          | L-canavanine<br>Alfalfa juice, 20% extract, 1 mg/g<br>Alfalfa leaf, 4:1 extract, 3 mg/g | 0.92 mg                      |
| Was a sample of the product (i.e., retention sample) retained? If so, where it is kept or deposited?                                                                           | Yes                                                                                  |                                                                                      |                                                                                         |                              |

\* All analyses were preformed by ConsumerLab.com. Specifics of special testing/purity testing are as follows (abbreviations used in tables defined at end of footnote): 1. Chlorinated pesticide screens were tested on the black cohosh and the multibotanical finished products, evaluated by GC/MS. The detection limit level was set at 50 parts per billion. The following were tested and were not found: pentachlorobenzene, tetrachloroaniline, hexachlorobenzene,  $\alpha$ -benzene hexachloride (BHC), pentachloronitrobenzene, lindane,  $\beta$ -BHC, heptachlor, pentachloroaniline,  $\delta$ -BHC, aldrin, pentachloroethoxyanisole, heptachlor, epoxide,  $\gamma$ -chlordane, endosulfan I,  $\alpha$ -chlordane, dieldrin, endrin, endrin aldehyde, endosulfan sulfate, dichloro-diphenyl-trichloroethane, dichlorodiphenyldichloroethylene, dichloro-diphenyl-dichloroethane, endosulfan II, methoxy-chlor, and endrine ketone. 2. Black cohosh, and the multibotanical were tested for heavy metals by inductively coupled plasma-mass spectroscopy. The black cohosh product contained  $<0.06 \mu\text{g}$  of lead,  $<0.06 \mu\text{g}$  of cadmium, and  $0.97 \mu\text{g}$  of arsenic. The multibotanical finished product contained  $<0.49 \mu\text{g}$  of lead,  $<0.0714 \mu\text{g}$  of cadmium, and  $1.16 \mu\text{g}$  of arsenic. 3. Alfalfa was tested for L-canavanine, an antinutrient, by using HP-TLC. The alfalfa leaf and juice extract raw material had 1 mg/g of L-canavanine in the juice extract (20% extract) and 3 mg/g in the leaf (4:1 extract). 4. Screening for estrogenic drug substances was detected by GC/MS. The following were tested and not found: diethylstilbestrol, estradiol, estrone, estriol, ethynyl estradiol, and tamoxifen. CE = capillary electrophoresis; GC = gas chromatography; HPLC = high-performance liquid chromatography; HP-TLC = high-performance thin-layer chromatography; MS = mass spectroscopy; NA = not available; TLC = thin-layer chromatography.

† Progyne (Progena, Albuquerque, NM, Lot 1051504).

‡ Per capsule: 50 mg of black cohosh, 100 mg of alfalfa, 1 mg of boron citrate, 50 mg of chaste tree, 100 mg of dong quai, 50 mg of false unicorn, 50 mg of licorice, 100 mg of oats, 100 mg of pomegranate, 100 mg of siberian ginseng; no filler or other constituents.

*Appendix Table—Continued*

**Multibotanical Product**

| <b>Chaste Tree</b>                                                                                      | <b>Dong Quai</b>                           | <b>False Unicorn</b>                                                   | <b>Licorice</b>                         | <b>Oats Straw</b>              | <b>Pomegranate</b>            | <b>Siberian Ginseng</b>           |
|---------------------------------------------------------------------------------------------------------|--------------------------------------------|------------------------------------------------------------------------|-----------------------------------------|--------------------------------|-------------------------------|-----------------------------------|
| <i>Vitex agnus-castus</i>                                                                               | <i>Angelica sinensis</i>                   | <i>Chamaelirium luteum</i>                                             | <i>Glycyrrhiza glabra</i>               | <i>Avena sativa</i>            | <i>Punica granatum</i>        | <i>Eleutherococcus senticosus</i> |
| Verbenaceae                                                                                             | Apiaceae                                   | Liliaceae                                                              | Fabaceae                                | Poaceae                        | Lythraceae                    | Araliaceae                        |
| Chaste berry, Monk's pepper, Abraham's balm, chaste lamb-tree, safe tree, Indian-spice, wild pepper     | Dong quai, dang gui, tang-kuei             | Starwort, helonias root, blazing star root, devil's bit, false unicorn | Lacrisse, sweet licorice, licorice root | Oats                           | Pomegranate                   | Ginseng                           |
| †                                                                                                       | †                                          | †                                                                      | †                                       | †                              | †                             | †                                 |
| No trademark or registration                                                                            | No trademark or registration               | No trademark or registration                                           | No trademark or registration            | No trademark or registration   | No trademark or registration  | No trademark or registration      |
| Berry                                                                                                   | Root                                       | Root                                                                   | Root                                    | Straw                          | Fruit                         | Root                              |
| Dry powder                                                                                              | Water and alcohol 4:1 extract              | Water and alcohol 4:1 extract                                          | Water and alcohol 4:1 extract           | Water and alcohol 10:1 extract | Dry powder                    | Water and alcohol 0.8% extract    |
| GC                                                                                                      | GC                                         | TLC                                                                    | TLC                                     | GC                             | GC                            | GC                                |
| 38699C                                                                                                  | SB01-0031                                  | 14C1-6                                                                 | 20012450                                | SB01-0136C-J                   | L5029P                        | SG001006C                         |
| No—past time of retention                                                                               | No—past time of retention                  | No—past time of retention                                              | No—past time of retention               | No—past time of retention      | No—past time of retention     | No—past time of retention         |
| 50 mg                                                                                                   | 100 mg                                     | 50 mg                                                                  | 50 mg                                   | 100 mg                         | 100 mg                        | 100 mg                            |
| ‡                                                                                                       | ‡                                          | ‡                                                                      | ‡                                       | ‡                              | ‡                             | ‡                                 |
| None                                                                                                    | None                                       | None                                                                   | None                                    | None                           | None                          | None                              |
| None                                                                                                    | None                                       | None                                                                   | None                                    | None                           | None                          | Eleutherosides B and E            |
| HPLC, CE                                                                                                | HPLC, CE                                   | HPLC, CE                                                               | HPLC, CE                                | Not tested                     | HP-TLC                        | HPLC, CE                          |
| NA                                                                                                      | NA                                         | NA                                                                     | NA                                      | NA                             | NA                            | 0.8%                              |
| Agnuside, 0.024%                                                                                        | Ligustilide, <0.001%; ferulic acid, 0.016% | Diosgenin (free)<br>Not detected                                       | Glycyrrhizic acid, 14%                  | Not tested                     | Polyphenolics<br>Not detected | Eleutherosides B and E, 1.6%      |
| Yes—for both products, a retention sample is being stored at the Group Health Center for Health Studies |                                            |                                                                        |                                         |                                |                               |                                   |
